# Supplementary material for: A Novel Predictive Multi-Marker Test for the Pre-Surgical Identification of Ovarian Cancer
Source: MDPI journal article supplement (doi:10.3390/cancers15215267), 2023-11-02
Supplement: s1 [file s1]

| Sample # | AGE at collection | menopausal status | Genetic predisposition<br>(BRCA1/2/WT/INC; LYNCH; BRIP1;<br>RAD51C; VUS) | Benign /<br>Malignant | Pathology type                                            | Tumour grade | Tumour Stage |
|----------|-------------------|-------------------|--------------------------------------------------------------------------|-----------------------|-----------------------------------------------------------|--------------|--------------|
| 8        | 21.2              | pre               | unknown                                                                  | Benign                | fibroma                                                   | n/a          | n/a          |
| 29       | 27.8              | pre               | unknown                                                                  | Benign                | mature teratoma                                           | n/a          | n/a          |
| 30       | 46.2              | pre               | unknown                                                                  | Benign                | cystadenomata                                             | n/a          | n/a          |
| 42       | 27.6              | pre               | unknown                                                                  | Benign                | hydrosalpinx                                              | n/a          | n/a          |
| 52       | 25.3              | pre               | unknown                                                                  | Benign                | fibroma                                                   | n/a          | n/a          |
| 135      | 43.0              | pre               | unknown                                                                  | Benign                | ectopic pregnancy and<br>haemorrhage                      | n/a          | n/a          |
| 226      |                   |                   |                                                                          | Benign                | endometrial hyperplasia with no<br>evidence of malignancy | n/a          | n/a          |
| 287      | 37.3              | pre               | unknown                                                                  | Benign                | Xanthogranulomatous                                       | n/a          | n/a          |
| 320      | 76.0              | pre               | unknown                                                                  | Benign                | cystadenoma                                               | n/a          | n/a          |
| 343      | 47.1              | pre               | unknown                                                                  | Benign                | fibroma                                                   | n/a          | n/a          |
| 344      | 51.1              | pre               | unknown                                                                  | Benign                | mature teratoma                                           | n/a          | n/a          |
| 356      | 46.3              | pre               | unknown                                                                  | Benign                | Torted infarcted ovarian<br>cystadenoma                   | n/a          | n/a          |
| 385      | 31.4              | pre               | unknown                                                                  | Benign                | cyst-dermoid                                              | n/a          | n/a          |
| 847      | 42.8              | pre               | unknown                                                                  | Benign                | Lipoid cell tumour                                        | n/a          | n/a          |
| 856      | 49.2              | pre               | unknown                                                                  | Benign                | cystadenoma                                               | n/a          | n/a          |
| 884      | 44.9              | pre               | unknown                                                                  | Benign                | cystadenoma                                               | n/a          | n/a          |
| 1023     | 46.1              | pre               | unknown                                                                  | Benign                | cyst                                                      | n/a          | n/a          |
| 1106     | 46.4              | pre               | unknown                                                                  | Benign                | ovarian endometriosis                                     | n/a          | n/a          |
| 1132     | 39.6              | pre               | BRCA1+                                                                   | Benign                | cyst, cervical metaplasia                                 | n/a          | n/a          |
| 1139     | 48.4              | pre               | BRCA2+                                                                   | Benign                | cervical metaplasia                                       | n/a          | n/a          |
| 1192     | 42.5              | pre               | BRCA2+                                                                   | Benign                | H corpus                                                  | n/a          | n/a          |
| 1203     | 46.8              | pre               | BRCA1+                                                                   | Benign                | cyst                                                      | n/a          | n/a          |
| 1229     | 44.0              | pre               | LYNCH                                                                    | Benign                | cervical metaplasia                                       | n/a          | n/a          |
| 1247     | 38.7              | pre               | BRCA2+                                                                   | Benign                | cyst                                                      | n/a          | n/a          |
| 1330     | 55.8              | pre               | BRCA2+                                                                   | Benign                | uterine leiomyomata                                       | n/a          | n/a          |
| 1380     | 46.5              | pre               | BRCA1+                                                                   | Benign                | uterine adenomyosis                                       | n/a          | n/a          |
| 1383     | 38.1              | pre               | unknown                                                                  | Benign                | uterine adenomyosis                                       | n/a          | n/a          |
| 1403     | 48.8              | pre               | BRCA1+                                                                   | Benign                | salpingitis and cyst                                      | n/a          | n/a          |
| 1438     | 40.4              | pre               | BRCA2+                                                                   | Benign                | H corpus, cyst                                            | n/a          | n/a          |
| 1444     | 39.8              | pre               | BRCA1+                                                                   | Benign                | uterine leiomyomata                                       | n/a          | n/a          |
| 1457     | 43.3              | pre               | LYNCH                                                                    | Benign                | uterine leiomyoma                                         | n/a          | n/a          |
| 1470     | 43.5              | pre               | unknown                                                                  | Benign                | adenofibroma                                              | n/a          | n/a          |
| 1506     | 52.5              | pre               | BRCA2+                                                                   | Benign                | salpingitis                                               | n/a          | n/a          |
| 1517     | 46.8              | pre               | LYNCH                                                                    | Benign                | cyst                                                      | n/a          | n/a          |
| 1538     | 47.4              | pre               | BRCA1+                                                                   | Benign                | benign changes                                            | n/a          | n/a          |
| 1542     | 41.3              | pre               | BRCA2+                                                                   | Benign                | cyst                                                      | n/a          | n/a          |
| 1562     | 40.2              | pre               | BRCA1+                                                                   | Benign                | cyst                                                      | n/a          | n/a          |
| 1572     | 40.5              | pre               | BRCA1+                                                                   | Benign                | cyst                                                      | n/a          | n/a          |
| 1587     | 41.1              | pre               | LYNCH                                                                    | Benign                | uterine leiomyoma                                         | n/a          | n/a          |
| 1595     | 42.3              | pre               | BRCA2+                                                                   | Benign                | benign changes                                            | n/a          | n/a          |
| 1605     | 37.6              | pre               | BRCA WILDTYPE                                                            | Benign                | mullerian cystadenoma                                     | n/a          | n/a          |
| 1615     | 46.7              | pre               | BRCA2+                                                                   | Benign                | cyst                                                      | n/a          | n/a          |
| 1622     | 49.9              | pre               | BRCA1+                                                                   | Benign                | uterine adenomyosis                                       | n/a          | n/a          |
| 1671     | 50.2              | pre               | BRCA2+                                                                   | Benign                | cyst                                                      | n/a          | n/a          |
| 1707     | 48.4              | pre               | BRCA2+                                                                   | Benign                | fibrous adhesions                                         | n/a          | n/a          |
| 1723     | 46.3              | pre               | unknown                                                                  | Benign                | cyst                                                      | n/a          | n/a          |
| 1750     | 50.9              | pre               | BRCA2+                                                                   | Benign                | cyst                                                      | n/a          | n/a          |
| 1754     | 34.1              | pre               | unknown                                                                  | Benign                | ovarian endometriosis, cyst                               | n/a          | n/a          |
| 1771     | 50.8              | pre               | BRCA1+                                                                   | Benign                | uterine leiomyoma                                         | n/a          | n/a          |
| 1788     | 47.1              | pre               | RADBRIP1+1C+                                                             | Benign                | ovarian endometriosis                                     | n/a          | n/a          |
| 1791     | 42.1              | pre               | BRCA2+                                                                   | Benign                | uterine leiomyoma                                         | n/a          | n/a          |
| 1796     | 48.6              | pre               | PALB2+                                                                   | Benign                | seromucinous cystadenoma                                  | n/a          | n/a          |
| 1802     | 48.3              | pre               | BRCA1+                                                                   | Benign                | cyst, uterine leiomyoma                                   | n/a          | n/a          |
| 1803     | 40.5              | pre               | BRCA2+                                                                   | Benign                | calcifications                                            | n/a          | n/a          |
| 1806     | 42.8              | pre               | BRCA1+                                                                   | Benign                | benign changes                                            | n/a          | n/a          |
| 1839     | 44.2              | pre               | Lynch syndrome                                                           | Benign                | cyst H corpus                                             | n/a          | n/a          |
| 1854     | 46.3              | pre               | BRCA1+                                                                   | Benign                | benign changes                                            | n/a          | n/a          |
| 1884     | 41.5              | pre               | RADBRIP1+1C+                                                             | Benign                | cyst                                                      | n/a          | n/a          |
| 1900     | 36.7              | pre               | BRCA2+                                                                   | Benign                | uterine adenomyosis                                       | n/a          | n/a          |
| 1914     | 41.5              | pre               | BRCA2+                                                                   | Benign                | H corpus                                                  | n/a          | n/a          |
| 1919     | 50.0              | pre               | RADBRIP1+1C+                                                             | Benign                | benign changes                                            | n/a          | n/a          |
| 1950     | 40.2              | pre               | Lynch syndrome                                                           | Benign                | cyst, uterine adenomyosis                                 | n/a          | n/a          |
| 1956     | 38.9              | pre               |                                                                          | Benign                | uterine leiomyoma, cervical<br>metaplasia                 | n/a          | n/a          |
| 1973     | 38.3              | pre               | BRCA1+                                                                   | Benign                | cyst                                                      | n/a          | n/a          |
| 1975     | 40.4              | pre               | BRCA2+                                                                   | Benign                | cyst                                                      | n/a          | n/a          |
| EP0020   | 42.3              | pre               | BRCA1+                                                                   | Benign                | cyst                                                      | n/a          | n/a          |
| EP0052   | 45.3              | pre               | LYNCH                                                                    | Benign                | cyst                                                      | n/a          | n/a          |
| EP0116   | 31.4              | pre               | BRCA1+                                                                   | Benign                | cyst                                                      | n/a          | n/a          |
| EP0196   | 46.1              | pre               | BRCA WILDTYPE                                                            | Benign                | cyst                                                      | n/a          | n/a          |
| EP0209   |                   |                   |                                                                          | Benign                | uterine adenomyosis, cervical<br>metaplasia               | n/a          | n/a          |
| EP0244   | 47.2              | pre               | unknown                                                                  | Benign                | H corpus                                                  | n/a          | n/a          |
| EP0275   | 43.1              | pre               | BRCA1+                                                                   | Benign                | uterine leiomyoma                                         | n/a          | n/a          |
| EP0276   | 50.1              | pre               | LYNCH                                                                    | Benign                | bladder papilloma benign                                  | n/a          | n/a          |
| EP0308   | 53.4              | pre               | unknown                                                                  | Benign                | ovarian endometriosis                                     | n/a          | n/a          |
| EP0312   | 36.3              | pre               | BRCA wildtype                                                            | Benign                | H corpus and cyst                                         | n/a          | n/a          |
| EP0348   | 41.8              | pre               | BRCA2+                                                                   | Benign                | cyst                                                      | n/a          | n/a          |
| EP0349   | 49.6              | pre               | BRCA1+                                                                   | Benign                | cyst and salpingosis                                      | n/a          | n/a          |
| EP0353   | 50.2              | pre               | BRCA WILDTYPE                                                            | Benign                | ovarian endometriosis and cyst                            | n/a          | n/a          |
| EP0371   | 33.4              | pre               | BRCA2+                                                                   | Benign                | H corpus                                                  | n/a          | n/a          |
| EP0383   | 43.7              | pre               | BRCA2+                                                                   | Benign                | cyst                                                      | n/a          | n/a          |
| EP0399   | 47.1              | pre               | unknown                                                                  | Benign                | serous cystadenoma                                        | n/a          | n/a          |
|          | 38.2              | pre               | BRCA2+                                                                   | Benign                | cyst                                                      | n/a          | n/a          |
|          | 35.8              | pre               | BRCA1+                                                                   | Benign                | cyst                                                      | n/a          | n/a          |

| Sample # | AGE at collection | menopausal status | Genetic predisposition<br>(BRCA1/2/WT/INC; LYNCH; BRIP1;<br>RAD51C; VUS) | Benign /<br>Malignant | Pathology type                                | Tumour grade | Tumour Stage |
|----------|-------------------|-------------------|--------------------------------------------------------------------------|-----------------------|-----------------------------------------------|--------------|--------------|
| EP0411   | 44.3              | pre               | BRCA1+                                                                   | Benign                | cyst                                          | n/a          | n/a          |
| EP0467   | 39.7              | pre               | BRCA1+                                                                   | Benign                | cyst                                          | n/a          | n/a          |
| 26       | 73.7              | post              | unknown                                                                  | Benign                | Cystadenoms                                   | n/a          | n/a          |
| 31       | 55.6              | post              | unknown                                                                  | Benign                | cystadenoma                                   | n/a          | n/a          |
| 41       | 65.0              | post              | Unknown                                                                  | Benign                | adenofibroma                                  | n/a          | n/a          |
| 47       | 55.4              | post              | unknown                                                                  | Benign                | cystadenoma                                   | n/a          | n/a          |
| 98       | 50.6              | post              | unknown                                                                  | Benign                | simple cyst                                   | n/a          | n/a          |
| 140      | 73.8              | post              | unknown                                                                  | Benign                | mucinous fibroma and benign<br>Brenner tumour | n/a          | n/a          |
| 352      | 74.3              | post              | unknown                                                                  | Benign                | Haemorrhagic ovarian torsion                  | n/a          | n/a          |
| 512      | 57.7              | post              | unknown                                                                  | Benign                | simple cyst                                   | n/a          | n/a          |
| 560      | 52.4              | post              | Unknown                                                                  | Benign                | fibroma                                       | n/a          | n/a          |
| 615      | 82.5              | post              | unknown                                                                  | Benign                | cystadenoma                                   | n/a          | n/a          |
| 620      | 63.6              | post              | unknown                                                                  | Benign                | fibrothecoma                                  | n/a          | n/a          |
| 646      | 82.5              | post              | Unknown                                                                  | Benign                | fibroma                                       | n/a          | n/a          |
| 723      | 87.4              | post              | unknown                                                                  | Benign                | cystadenofibroma                              | n/a          | n/a          |
| 753      | 62.2              | post              | unknown                                                                  | Benign                | cystadenoma                                   | n/a          | n/a          |
| 771      | 87.1              | post              | unknown                                                                  | Benign                | fibroma                                       | n/a          | n/a          |
| 775      | 54.1              | post              | unknown                                                                  | Benign                | Papillary adenofibroma of the<br>right ovary  | n/a          | n/a          |
| 788      | 57.1              | post              | unknown                                                                  | Benign                | fibroma                                       | n/a          | n/a          |
| 814      | 60.2              | post              | unknown                                                                  | Benign                | fibroma                                       | n/a          | n/a          |
| 843      | 80.7              | post              | unknown                                                                  | Benign                | cystadenofibroma                              | n/a          | n/a          |
| 879      | 56.1              | post              | unknown                                                                  | Benign                | cystadenoma                                   | n/a          | n/a          |
| 883      | 78.4              | post              | Unknown                                                                  | Benign                | fibroma                                       | n/a          | n/a          |
| 922      | 67.4              | post              | unknown                                                                  | Benign                | fibroma                                       | n/a          | n/a          |
| 996      | 61.9              | post              | BRCA2+                                                                   | Benign                | salpingitis                                   | n/a          | n/a          |
| 1082     | 57.2              | post              | BRCA1+                                                                   | Benign                | serous adenofibroma& brenner<br>tumour        | n/a          | n/a          |
| 1092     | 54.2              | post              | unknown                                                                  | Benign                | cyst                                          | n/a          | n/a          |
| 1103     | 49.7              | post              | unknown                                                                  | Benign                | H corpus & cyst                               | n/a          | n/a          |
| 1131     | 68.2              | post              | BRCA1+                                                                   | Benign                | cyst                                          | n/a          | n/a          |
| 1209     | 61.3              | post              | unknown                                                                  | Benign                | cyst                                          | n/a          | n/a          |
| 1288     | 60.4              | post              | BRCA2+                                                                   | Benign                | benign changes                                | n/a          | n/a          |
| 1289     | 66.0              | post              | BRCA1+                                                                   | Benign                | benign changes                                | n/a          | n/a          |
| 1307     | 55.7              | post              | unknown                                                                  | Benign                | benign changes                                | n/a          | n/a          |
| 1312     | 48.5              | post              | BRCA1+                                                                   | Benign                | cyst                                          | n/a          | n/a          |
| 1338     | 47.9              | post              | BRCA1+                                                                   | Benign                | salpingitis                                   | n/a          | n/a          |
| 1376     | 67.7              | post              | BRCA1+                                                                   | Benign                | stromal and leydig hyperplasia                | n/a          | n/a          |
| 1377     | 75.4              | post              | LYNCH                                                                    | Benign                | uterine adenomyosis                           | n/a          | n/a          |
| 1387     | 54.7              | post              | BRCA2+                                                                   | Benign                | Benign changes                                | n/a          | n/a          |
| 1414     | 63.3              | post              | unknown                                                                  | Benign                | cyst                                          | n/a          | n/a          |
| 1422     | 69.6              | post              | BRCA1+                                                                   | Benign                | cyst                                          | n/a          | n/a          |
| 1436     | 55.1              | post              | unknown                                                                  | Benign                | benign changes                                | n/a          | n/a          |
| 1461     | 42.5              | post              | BRCA2+                                                                   | Benign                | benign changes                                | n/a          | n/a          |
| 1480     | 51.3              | post              | BRCA2+                                                                   | Benign                | ovarian endometriosis                         | n/a          | n/a          |
| 1524     | 55.9              | post              | BRCA2+                                                                   | Benign                | uterine leiomyoma                             | n/a          | n/a          |
| 1525     | 54.3              | post              | LYNCH                                                                    | Benign                | cervical metaplasia                           | n/a          | n/a          |
| 1544     | 70.7              | post              | BRCA2+                                                                   | Benign                | serous cystadenoma                            | n/a          | n/a          |
| 1556     | 40.2              | post              | BRCA2+                                                                   | Benign                | cyst                                          | n/a          | n/a          |
| 1573     | 42.7              | post              | BRCA1+                                                                   | Benign                | cyst                                          | n/a          | n/a          |
| 1575     | 58.3              | post              | BRCA WILDTYPE                                                            | Benign                | cyst                                          | n/a          | n/a          |
| 1581     | 71.2              | post              | unknown                                                                  | Benign                | serous cystadenofibroma and<br>fibroma        | n/a          | n/a          |
| 1590     | 56.0              | post              | BRCA2+                                                                   | Benign                | benign changes                                | n/a          | n/a          |
| 1661     | 56.4              | post              | BRCA1+                                                                   | Benign                | uterine adenomyosis                           | n/a          | n/a          |
| 1670     | 56.3              | post              | LYNCH                                                                    | Benign                | cyst                                          | n/a          | n/a          |
| 1731     | 72.3              | post              | BRCA2+                                                                   | Benign                | benign changes                                | n/a          | n/a          |
| 1744     | 51.4              | post              | BRCA2+                                                                   | Benign                | uterine adenomyosis, cervical<br>metaplasia   | n/a          | n/a          |
| 1758     | 67.1              | post              | BRCA1+                                                                   | Benign                | serous cystadenoma                            | n/a          | n/a          |
| 1763     | 57.5              | post              | PALB2+                                                                   | Benign                | cyst                                          | n/a          | n/a          |
| 1790     | 63.0              | post              | BRCA2+                                                                   | Benign                | serous adenofibroma                           | n/a          | n/a          |
| 1792     | 52.6              | post              | RADBRIP1+1C+                                                             | Benign                | cyst & uterine adenomyosis                    | n/a          | n/a          |
| 1817     | 48.0              | post              | RADBRIP1+1C+                                                             | Benign                | hydrosalpinx                                  | n/a          | n/a          |
| 1841     | 65.7              | post              | PALB2+                                                                   | Benign                | cyst                                          | n/a          | n/a          |
| 1860     | 53.7              | post              | BRCA1+                                                                   | Benign                | uterine fibroids                              | n/a          | n/a          |
| 1864     | 67.3              | post              | PALB2+                                                                   | Benign                | cyst                                          | n/a          | n/a          |
| 1870     | 52.6              | post              | PALB2+                                                                   | Benign                | stromal hyperplasia                           | n/a          | n/a          |
| 1882     | 51.0              | post              | PALB2+                                                                   | Benign                | benign changes                                | n/a          | n/a          |
| 1907     | 67.5              | post              | PALB2+                                                                   | Benign                | hilar leydig cell hyperplasia                 | n/a          | n/a          |
| 1944     | 51.5              | post              | RADBRIP1+1C+                                                             | Benign                | mucinous cystadenoma                          | n/a          | n/a          |
| 1968     | 62.9              | post              | RADBRIP1+1C+                                                             | Benign                | cyst                                          | n/a          | n/a          |
| 1987     | 50.3              | post              | BRCA1+                                                                   | Benign                | benign changes                                | n/a          | n/a          |
| 2008     | 55.8              | post              | RADBRIP1+1C+                                                             | Benign                | uterine leiomyoma adenomyosis                 | n/a          | n/a          |
| EP0003   | 64.6              | post              | BRCA2+                                                                   | Benign                | cyst                                          | n/a          | n/a          |
| EP0017   | 46.9              | post              | BRCA1+                                                                   | Benign                | fibroma and H corpus                          | n/a          | n/a          |
| EP0071   | 55.0              | post              | BRCA1+                                                                   | Benign                | uterine leiomyomata                           | n/a          | n/a          |
| EP0084   | 63.7              | post              | BRCA2+                                                                   | Benign                | cyst                                          | n/a          | n/a          |
| EP0099   | 59.2              | post              | unknown                                                                  | Benign                | cyst                                          | n/a          | n/a          |
| EP0100   | 66.5              | post              | BRCA2+                                                                   | Benign                | cyst                                          | n/a          | n/a          |
| EP0177   | 55.9              | post              | BRCA1+                                                                   | Benign                | serous cystadenofibroma                       | n/a          | n/a          |
| EP0208   | 53.0              | post              | BRCA2+                                                                   | Benign                | fibroma                                       | n/a          | n/a          |
| EP0211   | 58.0              | post              | unknown                                                                  | Benign                | serous cystadenofibromata                     | n/a          | n/a          |

| Sample # | AGE at collection | menopausal status | Genetic predisposition<br>(BRCA1/2/WT/INC; LYNCH; BRIP1; RAD51C; VUS) | Benign / Malignant | Pathology type                       | Tumour grade | Tumour Stage |
|----------|-------------------|-------------------|-----------------------------------------------------------------------|--------------------|--------------------------------------|--------------|--------------|
| EP0214   | 50.5              | post              | BRCA2+                                                                | Benign             | ovarian endometriosis and cyst       | n/a          | n/a          |
| EP0225   | 58.6              | post              | BRCA2+                                                                | Benign             | serous cystadenoma                   | n/a          | n/a          |
| EP0305   | 65.3              | post              | BRCA2+                                                                | Benign             | benign changes                       | n/a          | n/a          |
| EP0316   | 57.1              | post              | BRCA2+                                                                | Benign             | serous adenofibroma                  | n/a          | n/a          |
| EP0335   | 60.4              | post              | unknown                                                               | Benign             | salpingitis                          | n/a          | n/a          |
| EP0357   | 48.3              | post              | unknown                                                               | Benign             | cyst serous                          | n/a          | n/a          |
| EP0372   | 62.2              | post              | unknown                                                               | Benign             | mucinous cystadenofibroma            | n/a          | n/a          |
| EP0384   | 44.6              | post              | BRCA1+                                                                | Benign             | ovarian endometriosis                | n/a          | n/a          |
| EP0390   | 55.6              | post              | BRCA2+                                                                | Benign             | benign changes                       | n/a          | n/a          |
| EP0392   | 57.0              | post              | BRCA2+                                                                | Benign             | cyst                                 | n/a          | n/a          |
| 388      | 40.9              | pre               | BRCA WILDTYPE                                                         | Malignant          | Granulosa cell tumour                | 2            | 1A           |
| 464      | 50.8              | pre               | unknown                                                               | Malignant          | endometroid                          | 1            | 1A           |
| 845      | 29.0              | pre               | Unknown                                                               | Malignant          | mucinous                             | 2            | 1A           |
| 909      | 50.4              | pre               | unknown                                                               | Malignant          | clear cell                           | 3            | 1A           |
| 526      | 60.1              | post              | unknown                                                               | Malignant          | endometroid                          | 3            | 1A           |
| 894      | 54.8              | post              | unknown                                                               | Malignant          | serous                               | 3            | 1A           |
| 999      | 60.1              | post              | unknown                                                               | Malignant          | mucinous                             | 1            | 1A           |
| 1179     | 53.8              | post              | unknown                                                               | Malignant          | serous                               | 3            | 1A           |
| 649      | 40.1              | pre               | unknown                                                               | Malignant          | dysgerminoma                         | 2            | 1B           |
| 839      | 40.8              | pre               | LYNCH                                                                 | Malignant          | endometroid / clear cell             | 3            | 1B           |
| 56       | 49.7              | pre               | unknown                                                               | Malignant          | mucinous                             | 1            | 1C           |
| 136      | 48.5              | pre               | unknown                                                               | Malignant          | clear cell                           | 3            | 1C           |
| 262      | 42.1              | pre               | BRCA1+                                                                | Malignant          | clear cell                           | 3            | 1C           |
| 323      | 47.8              | pre               | LYNCH                                                                 | Malignant          | serous / endometroid                 | 2            | 1C           |
| 844      | 41.3              | pre               | unknown                                                               | Malignant          | mucinous                             | 2            | 1C           |
| 350      | 53.0              | post              | unknown                                                               | Malignant          | endometroid                          | 2            | 1C           |
| 685      | 56.7              | post              | unknown                                                               | Malignant          | mucinous                             | 2            | 1C           |
| 1071     | 53.9              | post              | BRCA1+                                                                | Malignant          | serous                               | 3            | 2A           |
| 1197     | 73.4              | post              | unknown                                                               | Malignant          | serous                               | 2            | 2A           |
| 422      | 68.8              | post              | unknown                                                               | Malignant          | serous                               | 3            | 2C           |
| 629      | 68.4              | post              | unknown                                                               | Malignant          | serous                               | 2            | 2C           |
| 155      | 56.0              | post              | BRCA2+                                                                | Malignant          | serous                               | 2            | 3A           |
| 1077     | 59.4              | post              | BRCA WILDTYPE                                                         | Malignant          | serous                               | 3            | 3A           |
| 197      | 49.3              | pre               | unknown                                                               | Malignant          | serous                               | 3            | 3B           |
| 450      | 45.1              | pre               | unknown                                                               | Malignant          | serous                               | 2            | 3B           |
| 1016     | 37.1              | pre               | BRCA1+                                                                | Malignant          | serous                               | 3            | 3B           |
| 143      | 75.3              | post              | Unknown                                                               | Malignant          | serous/Primary peritoneal            | 3            | 3B           |
| 349      | 74.0              | post              | unknown                                                               | Malignant          | serous                               | 2            | 3B           |
| 961      | 53.0              | post              | BRCA WILDTYPE                                                         | Malignant          | serous                               | 3            | 3B           |
| 10       | 48.8              | pre               | BRCA1+                                                                | Malignant          | serous                               | 3            | 3C           |
| 21       | 52.5              | pre               | unknown                                                               | Malignant          | serous                               | 3            | 3C           |
| 68       | 51.5              | pre               | BRCA wildtype                                                         | Malignant          | serous                               | 3            | 3C           |
| 129      | 53.8              | pre               | unknown                                                               | Malignant          | serous                               | 3            | 3C           |
| 147      | 51.2              | pre               | unknown                                                               | Malignant          | serous                               | 3            | 3C           |
| 239      | 49.0              | pre               | Unknown                                                               | Malignant          | serous                               | 2            | 3C           |
| 247      | 46.5              | pre               | unknown                                                               | Malignant          | serous                               | 3            | 3C           |
| 252      | 52.4              | pre               | BRCA WILDTYPE                                                         | Malignant          | serous                               | 3            | 3C           |
| 301      | 49.2              | pre               | unknown                                                               | Malignant          | serous / clear cell                  | 3            | 3C           |
| 317      | 46.8              | pre               | BRCA WILDTYPE                                                         | Malignant          | serous                               | 3            | 3C           |
| 321      | 53.8              | pre               | BRCA WILDTYPE                                                         | Malignant          | serous                               | 3            | 3C           |
| 336      | 47.5              | pre               | unknown                                                               | Malignant          | serous                               | 2            | 3C           |
| 392      | 48.4              | pre               | BRCA2+                                                                | Malignant          | serous                               | 3            | 3C           |
| 412      | 37.4              | pre               | unknown                                                               | Malignant          | adenocarcinoma poorly differentiated | 3            | 3C           |
| 561      | 38.2              | pre               | BRCA1+                                                                | Malignant          | serous                               | 3            | 3C           |
| 600      | 47.6              | pre               | BRCA WILDTYPE                                                         | Malignant          | serous                               | 3            | 3C           |
| 859      | 39.2              | pre               | unknown                                                               | Malignant          | clear cell                           | 3            | 3C           |
| 1142     | 45.1              | pre               | VUS                                                                   | Malignant          | serous                               | 3            | 3C           |
| 7        | 51.6              | post              | Unknown                                                               | Malignant          | serous                               | 3            | 3C           |
| 19       | 73.2              | post              | unknown                                                               | Malignant          | MMMT/carcinomasarcoma                | 3            | 3C           |
| 33       | 54.0              | post              | BRCA WILDTYPE                                                         | Malignant          | serous                               | 2            | 3C           |
| 37       | 69.3              | post              | VUS (polymorphism in BRCA2)                                           | Malignant          | serous                               | 3            | 3C           |
| 38       | 75.9              | post              | Unknown                                                               | Malignant          | serous                               | 3            | 3C           |
| 40       | 70.8              | post              | unknown                                                               | Malignant          | serous                               | 3            | 3C           |
| 55       | 76.1              | post              | unknown                                                               | Malignant          | clear cell                           | 3            | 3C           |
| 58       | 67.8              | post              | Unknown                                                               | Malignant          | serous                               | 3            | 3C           |
| 66       | 81.6              | post              | Unknown                                                               | Malignant          | serous/primary peritoneal            | 1            | 3C           |
| 70       | 59.9              | post              | BRCA wildtype                                                         | Malignant          | serous                               | 2            | 3C           |
| 73       | 67.2              | post              | unknown                                                               | Malignant          | serous                               | 3            | 3C           |
| 75       | 78.2              | post              | unknown                                                               | Malignant          | serous                               | 3            | 3C           |
| 83       | 72.9              | post              | Unknown                                                               | Malignant          | serous                               | 3            | 3C           |
| 85       | 75.8              | post              | unknown                                                               | Malignant          | serous                               | 3            | 3C           |
| 91       | 65.2              | post              | Unknown                                                               | Malignant          | serous                               | 3            | 3C           |
| 130      | 68.2              | post              | Unknown                                                               | Malignant          | serous                               | 3            | 3C           |
| 134      | 70.1              | post              | Unknown                                                               | Malignant          | serous                               | 3            | 3C           |
| 138      | 71.6              | post              | Unknown                                                               | Malignant          | serous                               | 3            | 3C           |
| 167      | 83.2              | post              | Unknown                                                               | Malignant          | serous                               | 3            | 3C           |
| 168      | 65.9              | post              | unknown                                                               | Malignant          | serous                               | 3            | 3C           |
| 173      | 80.9              | post              | unknown                                                               | Malignant          | serous                               | 3            | 3C           |
| 176      | 76.8              | post              | unknown                                                               | Malignant          | serous                               | 3            | 3C           |
| 181      | 73.7              | post              | unknown                                                               | Malignant          | serous                               | 3            | 3C           |
| 183      | 60.3              | post              | unknown                                                               | Malignant          | serous                               | 3            | 3C           |
| 185      | 64.7              | post              | Unknown                                                               | Malignant          | serous                               | 3            | 3C           |
| 186      | 59.6              | post              | unknown                                                               | Malignant          | clear cell                           | 3            | 3C           |
| 190      | 68.6              | post              | unknown                                                               | Malignant          | mucinous                             | 2            | 3C           |
| 191      | 60.8              | post              | unknown                                                               | Malignant          | serous                               | 3            | 3C           |
| 193      | 68.7              | post              | unknown                                                               | Malignant          | serous                               | 3            | 3C           |

| Sample # | AGE at collection | menopausal status | Genetic predisposition<br>(BRCA1/2/WT/INC; LYNCH; BRIP1;<br>RAD51C; VUS) | Benign /<br>Malignant | Pathology type                            | Tumour grade | Tumour Stage |
|----------|-------------------|-------------------|--------------------------------------------------------------------------|-----------------------|-------------------------------------------|--------------|--------------|
| 201      | 65.3              | post              | unknown                                                                  | Malignant             | endometrioid                              | 2            | 3C           |
| 217      | 73.2              | post              | unknown                                                                  | Malignant             | serous                                    | 3            | 3C           |
| 225      | 74.6              | post              | unknown                                                                  | Malignant             | serous                                    | 3            | 3C           |
| 228      | 67.5              | post              | unknown                                                                  | Malignant             | clear cell                                | 3            | 3C           |
| 237      | 66.3              | post              | unknown                                                                  | Malignant             | serous                                    | 3            | 3C           |
| 242      | 56.5              | post              | Unknown                                                                  | Malignant             | serous                                    | 3            | 3C           |
| 248      | 75.9              | post              | unknown                                                                  | Malignant             | serous / endometrioid                     | 3            | 3C           |
| 253      | 59.1              | post              | unknown                                                                  | Malignant             | serous                                    | 3            | 3C           |
| 254      | 73.1              | post              | unknown                                                                  | Malignant             | serous                                    | 3            | 3C           |
| 282      | 55.8              | post              | unknown                                                                  | Malignant             | serous                                    | 3            | 3C           |
| 295      | 64.9              | post              | Unknown                                                                  | Malignant             | serous                                    | 3            | 3C           |
| 307      | 92.2              | post              | Unknown                                                                  | Malignant             | serous                                    | 3            | 3C           |
| 309      | 72.0              | post              | Unknown                                                                  | Malignant             | serous                                    | 3            | 3C           |
| 339      | 53.4              | post              | VUS                                                                      | Malignant             | serous                                    | 2            | 3C           |
| 340      | 62.4              | post              | unknown                                                                  | Malignant             | serous / clear cell                       | 3            | 3C           |
| 348      | 67.8              | post              | unknown                                                                  | Malignant             | serous / clear cell                       | 3            | 3C           |
| 351      | 65.2              | post              | unknown                                                                  | Malignant             | endometrioid                              | 3            | 3C           |
| 361      | 69.1              | post              | BRCA WILDTYPE                                                            | Malignant             | serous                                    | 3            | 3C           |
| 366      | 63.0              | post              | unknown                                                                  | Malignant             | serous                                    | 3            | 3C           |
| 368      | 83.7              | post              | unknown                                                                  | Malignant             | serous / endometrioid                     | 2            | 3C           |
| 389      | 74.9              | post              | unknown                                                                  | Malignant             | serous                                    | 3            | 3C           |
| 405      | 84.4              | post              | Unknown                                                                  | Malignant             | serous                                    | 3            | 3C           |
| 409      | 63.7              | post              | Unknown                                                                  | Malignant             | serous                                    | 3            | 3C           |
| 413      | 63.4              | post              | Unknown                                                                  | Malignant             | serous                                    | 3            | 3C           |
| 436      | 65.1              | post              | unknown                                                                  | Malignant             | serous                                    | 3            | 3C           |
| 452      | 61.0              | post              | unknown                                                                  | Malignant             | serous papillary/some squamoid appearance | 3            | 3C           |
| 461      | 67.7              | post              | BRCA WILDTYPE                                                            | Malignant             | serous                                    | 3            | 3C           |
| 490      | 88.4              | post              | unknown                                                                  | Malignant             | serous                                    | 3            | 3C           |
| 536      | 83.9              | post              | unknown                                                                  | Malignant             | serous                                    | 3            | 3C           |
| 552      | 54.8              | post              | BRCA2+                                                                   | Malignant             | serous                                    | 3            | 3C           |
| 590      | 74.2              | post              | unknown                                                                  | Malignant             | serous                                    | 3            | 3C           |
| 597      | 67.8              | post              | unknown                                                                  | Malignant             | serous                                    | 3            | 3C           |
| 598      | 55.8              | post              | BRCA WILDTYPE                                                            | Malignant             | serous                                    | 3            | 3C           |
| 605      | 63.1              | post              | unknown                                                                  | Malignant             | serous                                    | 3            | 3C           |
| 606      | 46.5              | post              | BRCA WILDTYPE                                                            | Malignant             | serous                                    | 3            | 3C           |
| 609      | 63.5              | post              | unknown                                                                  | Malignant             | serous                                    | 3            | 3C           |
| 617      | 72.4              | post              | unknown                                                                  | Malignant             | serous                                    | 3            | 3C           |
| 626      | 79.9              | post              | unknown                                                                  | Malignant             | serous                                    | 3            | 3C           |
| 630      | 53.5              | post              | BRCA1+                                                                   | Malignant             | serous                                    | 3            | 3C           |
| 650      | 59.3              | post              | BRCA WILDTYPE                                                            | Malignant             | serous                                    | 3            | 3C           |
| 660      | 67.3              | post              | Unknown                                                                  | Malignant             | serous                                    | 3            | 3C           |
| 674      | 68.8              | post              | BRCA WILDTYPE                                                            | Malignant             | serous                                    | 3            | 3C           |
| 677      | 91.2              | post              | unknown                                                                  | Malignant             | serous                                    | 3            | 3C           |
| 679      | 69.8              | post              | BRCA WILDTYPE                                                            | Malignant             | serous                                    | 1            | 3C           |
| 701      | 65.3              | post              | unknown                                                                  | Malignant             | serous                                    | 3            | 3C           |
| 739      | 65.4              | post              | BRCA2+                                                                   | Malignant             | serous                                    | 3            | 3C           |
| 787      | 67.1              | post              | unknown                                                                  | Malignant             | serous / mucinous                         | 3            | 3C           |
| 793      | 62.6              | post              | BRCA WILDTYPE                                                            | Malignant             | serous                                    | 3            | 3C           |
| 796      | 60.9              | post              | Unknown                                                                  | Malignant             | serous                                    | 3            | 3C           |
| 803      | 63.8              | post              | BRCA wildtype                                                            | Malignant             | serous                                    | 3            | 3C           |
| 804      | 76.2              | post              | unknown                                                                  | Malignant             | serous                                    | 3            | 3C           |
| 822      | 63.8              | post              | unknown                                                                  | Malignant             | serous                                    | 3            | 3C           |
| 829      | 65.4              | post              | BRCA WILDTYPE                                                            | Malignant             | serous                                    | 3            | 3C           |
| 840      | 67.2              | post              | unknown                                                                  | Malignant             | clear cell/serous                         | 3            | 3C           |
| 865      | 58.2              | post              | unknown                                                                  | Malignant             | serous                                    | 3            | 3C           |
| 870      | 54.0              | post              | Unknown                                                                  | Malignant             | serous                                    | 3            | 3C           |
| 913      | 71.3              | post              | unknown                                                                  | Malignant             | serous                                    | 3            | 3C           |
| 949      | 66.2              | post              | unknown                                                                  | Malignant             | serous                                    | 3            | 3C           |
| 950      | 74.0              | post              | unknown                                                                  | Malignant             | serous                                    | 3            | 3C           |
| 969      | 61.1              | post              | BRCA WILDTYPE                                                            | Malignant             | serous                                    | 3            | 3C           |
| 976      | 60.9              | post              | unknown                                                                  | Malignant             | serous                                    | 3            | 3C           |
| 986      | 71.0              | post              | unknown                                                                  | Malignant             | serous                                    | 3            | 3C           |
| 1005     | 85.1              | post              | unknown                                                                  | Malignant             | serous                                    | 3            | 3C           |
| 1006     | 59.5              | post              | unknown                                                                  | Malignant             | serous                                    | 3            | 3C           |
| 1018     | 76.8              | post              | unknown                                                                  | Malignant             | serous                                    | 3            | 3C           |
| 1020     | 71.0              | post              | BRCA WILDTYPE                                                            | Malignant             | serous                                    | 3            | 3C           |
| 1021     | 70.0              | post              | BRCA WILDTYPE                                                            | Malignant             | serous                                    | 3            | 3C           |
| 1028     | 75.2              | post              | unknown                                                                  | Malignant             | serous                                    | 3            | 3C           |
| 1038     | 69.1              | post              | unknown                                                                  | Malignant             | serous                                    | 3            | 3C           |
| 1040     | 53.7              | post              | unknown                                                                  | Malignant             | serous                                    | 3            | 3C           |
| 1041     | 68.7              | post              | BRCA WILDTYPE                                                            | Malignant             | serous                                    | 3            | 3C           |
| 1066     | 52.1              | post              | BRCA2+                                                                   | Malignant             | serous                                    | 3            | 3C           |
| 1067     | 61.3              | post              | BRCA WILDTYPE                                                            | Malignant             | serous                                    | 3            | 3C           |
| 1100     | 70.8              | post              | BRCA WILDTYPE                                                            | Malignant             | serous                                    | 3            | 3C           |
| 1101     | 72.3              | post              | unknown                                                                  | Malignant             | serous                                    | 3            | 3C           |
| 1102     | 67.3              | post              | unknown                                                                  | Malignant             | serous                                    | 3            | 3C           |
| 1107     | 70.8              | post              | unknown                                                                  | Malignant             | clear cell                                | 3            | 3C           |
| 1110     | 71.2              | post              | BRCA wildtype                                                            | Malignant             | serous                                    | 3            | 3C           |
| 1112     | 70.6              | post              | unknown                                                                  | Malignant             | adenocarcinoma poorly differentiated      | 3            | 3C           |
| 1117     | 75.2              | post              | unknown                                                                  | Malignant             | serous                                    | 3            | 3C           |
| 1124     | 61.9              | post              | unknown                                                                  | Malignant             | adenocarcinoma poorly differentiated      | 3            | 3C           |
| 1149     | 70.7              | post              | BRCA2+                                                                   | Malignant             | serous                                    | 3            | 3C           |
| 1154     | 47.1              | post              | BRCA WILDTYPE                                                            | Malignant             | serous                                    | 3            | 3C           |
| 1205     | 75.5              | post              | unknown                                                                  | Malignant             | serous                                    | 3            | 3C           |
| 1221     | 67.4              | post              | BRCA WILDTYPE                                                            | Malignant             | serous                                    | 3            | 3C           |

| Sample # | AGE at collection | menopausal status | Genetic predisposition<br>(BRCA1/2/WT/INC; LYNCH; BRIP1;<br>RAD51C; VUS) | Benign /<br>Malignant | Pathology type        | Tumour grade | Tumour Stage |
|----------|-------------------|-------------------|--------------------------------------------------------------------------|-----------------------|-----------------------|--------------|--------------|
| 1234     | 74.1              | post              | BRCA WILDTYPE                                                            | Malignant             | serous                | 3            | 3C           |
| 1256     | 59.6              | post              | BRCA wildtype                                                            | Malignant             | serous                | 3            | 3C           |
| 394      | 82.1              | post              | unknown                                                                  | Malignant             | Mixed MMMT/clear cell | 3            | 4B           |
